# Supplementary material for: Evasion of antiviral bacterial immunity by phage tRNAs
Source: PubMed Central journal article supplement (PMC11555353; doi:10.1038/s41467-024-53789-y), 2024-11-11
Supplement: 41467_2024_53789_MOESM1_ESM.pdf [file 41467_2024_53789_MOESM1_ESM.pdf]

1  
2  
3

## **Evasion of antiviral bacterial immunity by phage tRNAs**

**a**

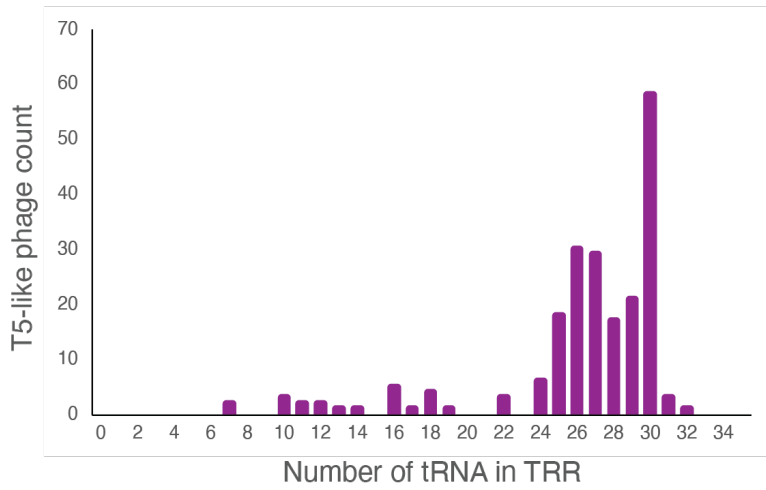

**b**

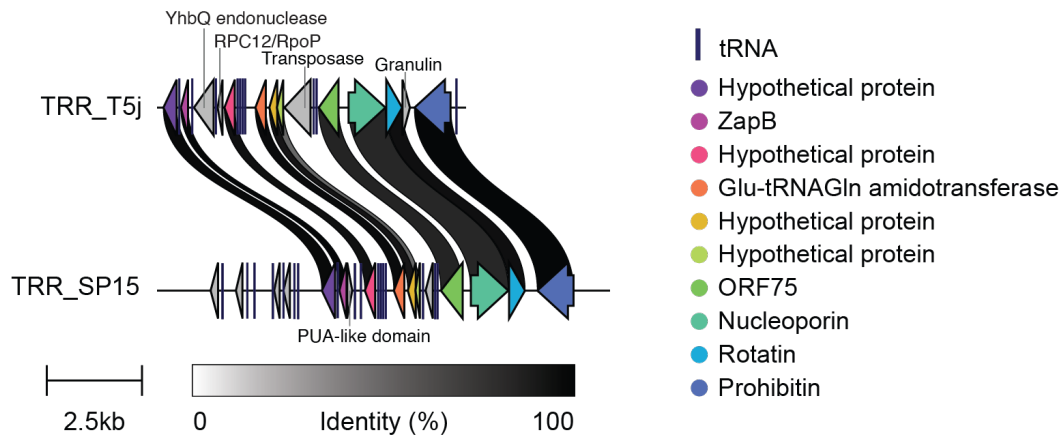

**Supplementary Figure 1.**

(A) Quantification of tRNA in the tRNA-rich region (TRR) of 203 T5-like phages from the NCBI database.

(B) Genomic alignment of TRR between T5j and SP15. Identical genes shared between T5j and SP15 are highlighted in different colors. The presence of tRNA is indicated by a dark blue vertical line. The alignment was performed using Clinker<sup>1</sup>.

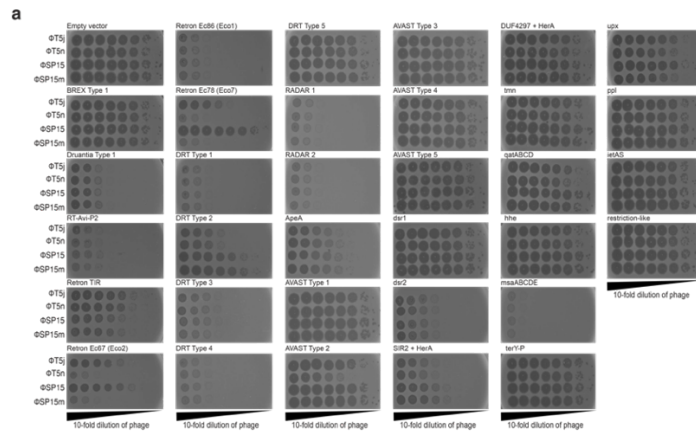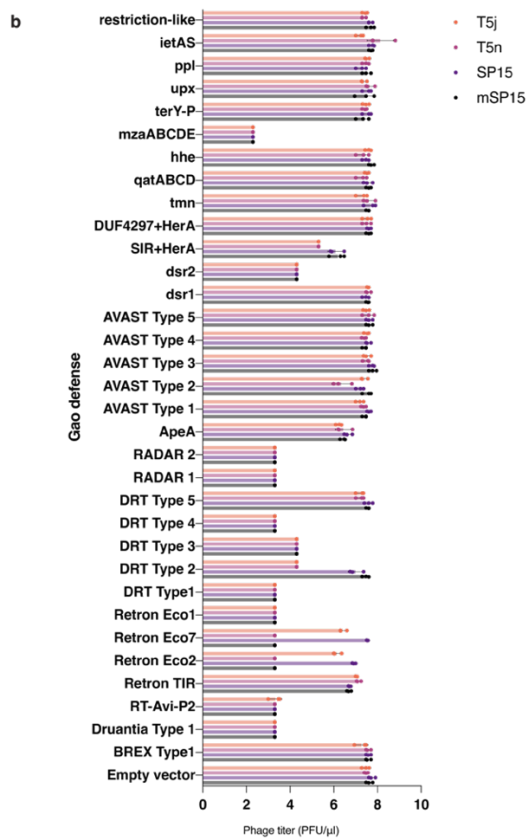

11

12 **Supplementary Figure 2.**

13 Infectivity of phage (T5j and SP15) and their respective mutants (T5n and SP15m) on bacteria  
 14 carrying different antiphage defense systems reported in Gao et al<sup>1</sup>. (A) Phage spot assay using  
 15 10-fold diluted phage solution. (B) Quantification of phage titer propagated in bacteria carrying  
 16 the Gao defense system. Experimental results illustrated in (A) and (B) were obtained after  
 17 performing the experiments in triplicates. Data are presented as mean values  $\pm$  SD. Source data  
 18 are provided as a Source Data File.

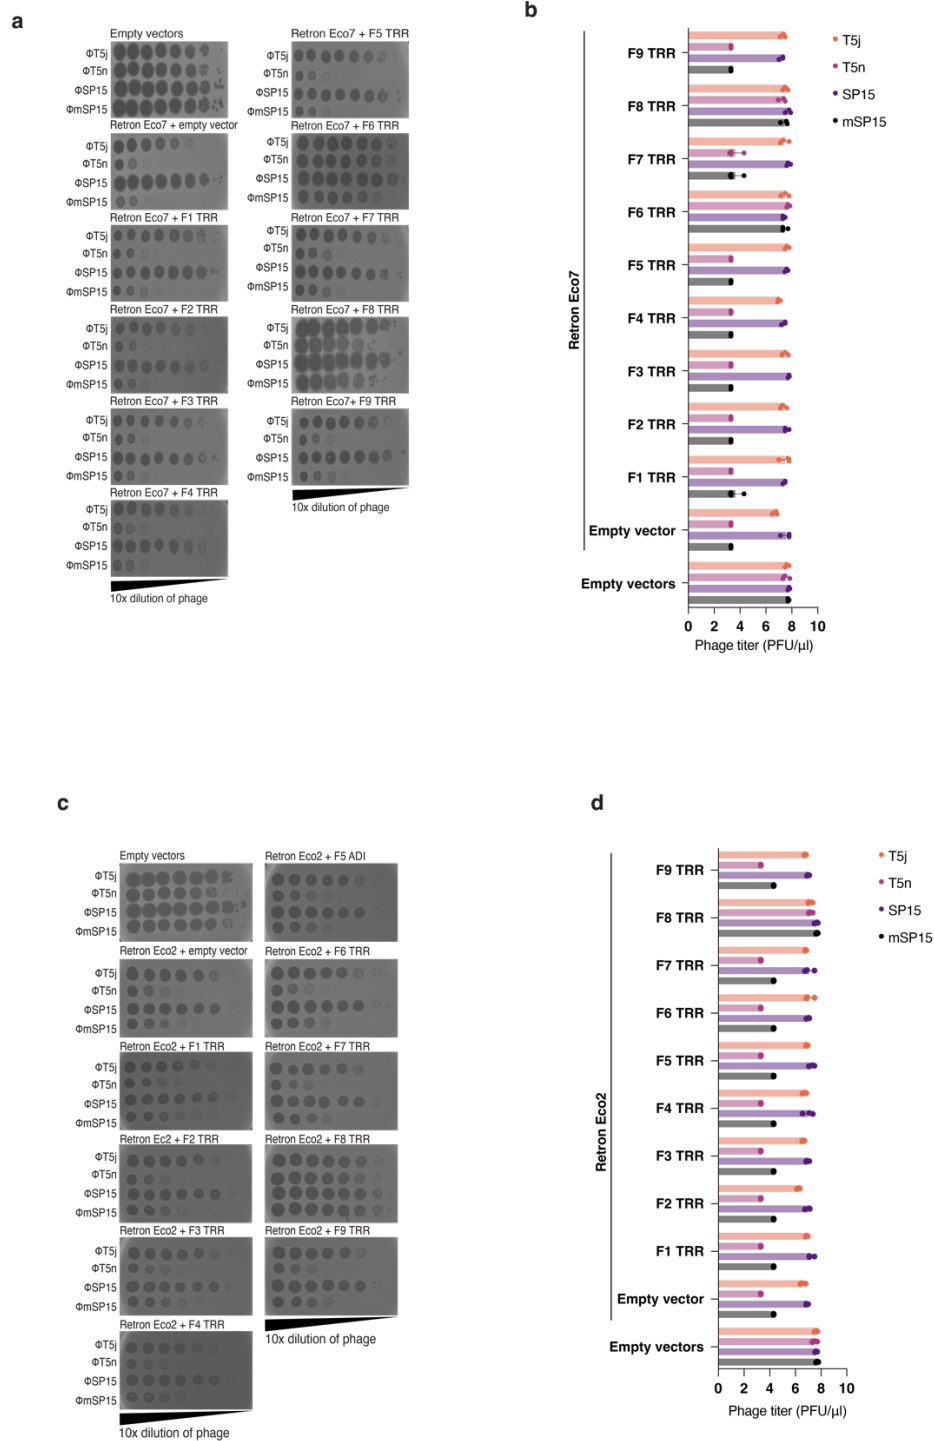

19  
20  
21  
22  
23  
24  
25  
26

### Supplementary Figure 3.

Co-expression of TRR fragment from SP15 and retrons. Co-expression of the TRR fragment from SP15 with retron-Eco7 (A, B) or Eco2 (C, D). Spot assay of wild-type phages (T5j and SP15) and their respective mutants (T5n and SP15m) on bacteria carrying fragmented TRR and retron-Eco7 (A) or Eco2 (C). (B) Quantified phage titer propagated in bacteria carrying different TRR and retron-Eco7 (B) or Eco2 (D). The experiments were performed in three biological replicates. Data are presented as mean values  $\pm$  SD. Source data are provided as a Source Data File.

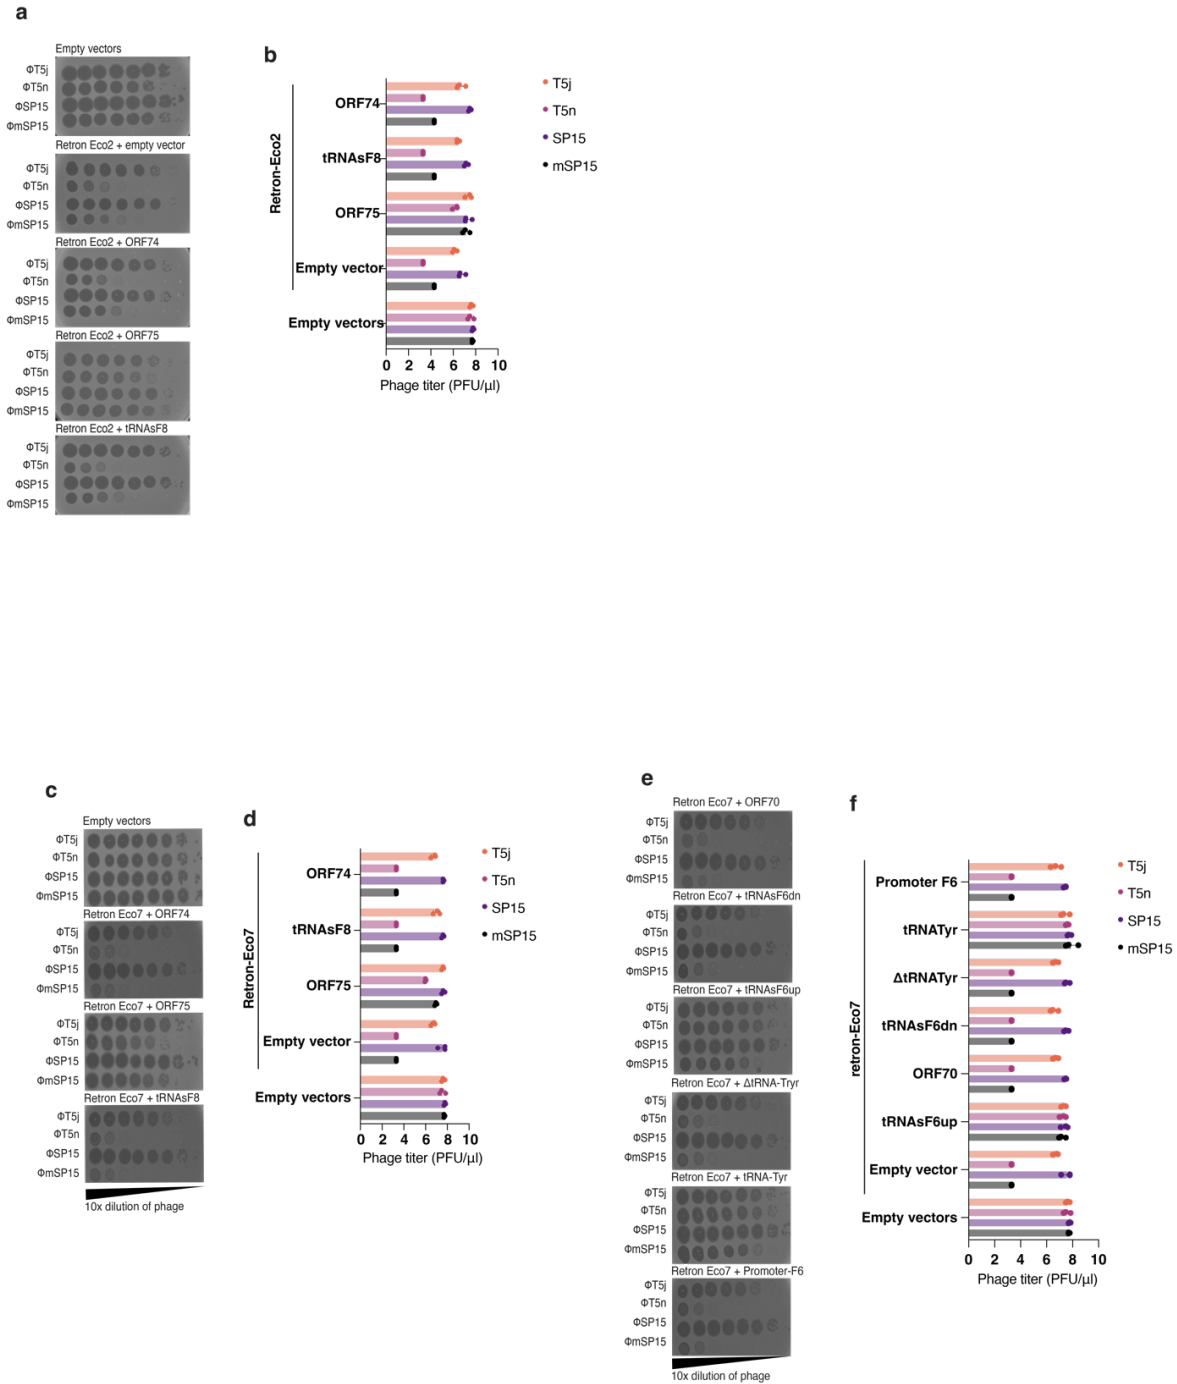

27  
28  
29  
30  
31  
32  
33  
34  
35  
36

#### Supplementary Figure 4.

Fragmentation of the TRR fragments 6 and 8. Co-expression of the TRR fragment 6 (F6) or 8 (F8) with retron-Eco2 (A, B) or Eco7 (C–F). Spot assay of wild-type phages (T5j and SP15) and their respective mutants (T5n and SP15m) on bacteria co-expressing genetic component of F8 and retron-Eco2 (A) or Eco7 (C). Quantified phage titer propagated in bacteria carrying genetic component of F8 and retron-Eco2 (B) or Eco7 (D). Spot assay (E) and quantified phage titer (F) (wild-type and mutants) on bacteria co-expressing genetic components of F6 and retron-Eco7. The experiments were performed in three biological replicates. Data are presented as mean values  $\pm$  SD. Source data are provided as a Source Data File.

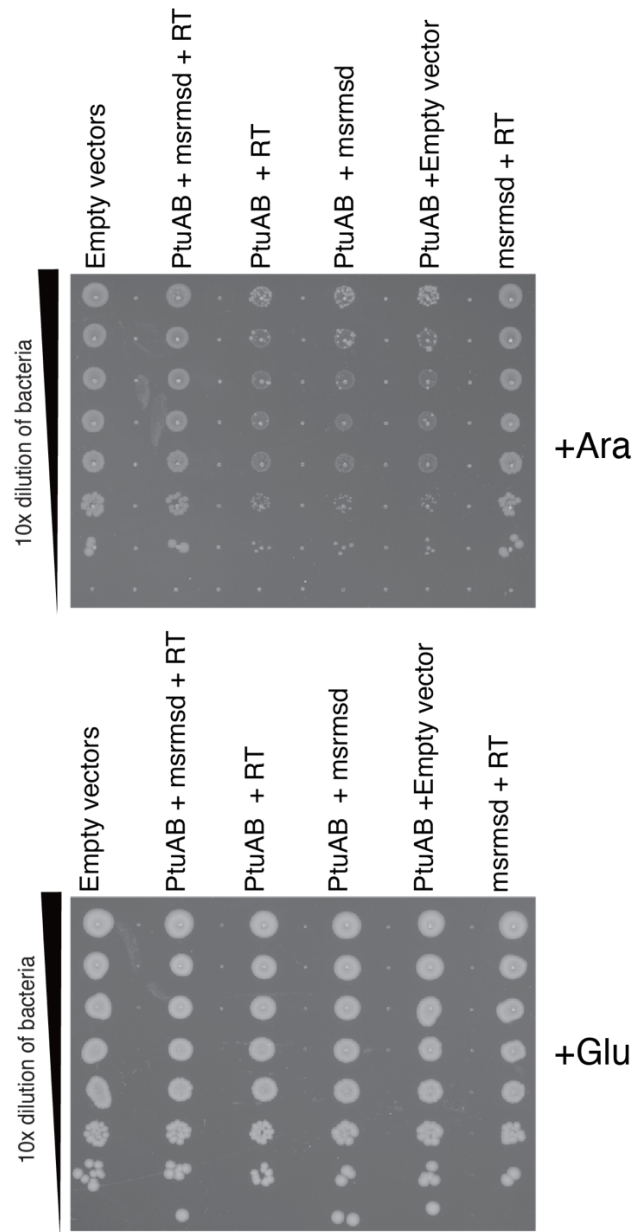

37

38 **Supplementary Figure 5.**

39 Toxicity assay of bacteria co-expressing the retron-Eco7 component in two inducible plasmids.

40 The toxin component, PtuAB, was expressed under the pBAD inducible promoter, whereas the

41 anti-toxin component RT/msrmsd/both RT and msrmsd were expressed under the pATc inducible

42 promoter. The anti-toxin was continuously expressed by adding 50 ng/mL of anhydrous

43 tetracycline in both induced toxin conditions (Arabinose added) (top) or non-induced toxin

44 conditions (Glucose added) (bottom).

45

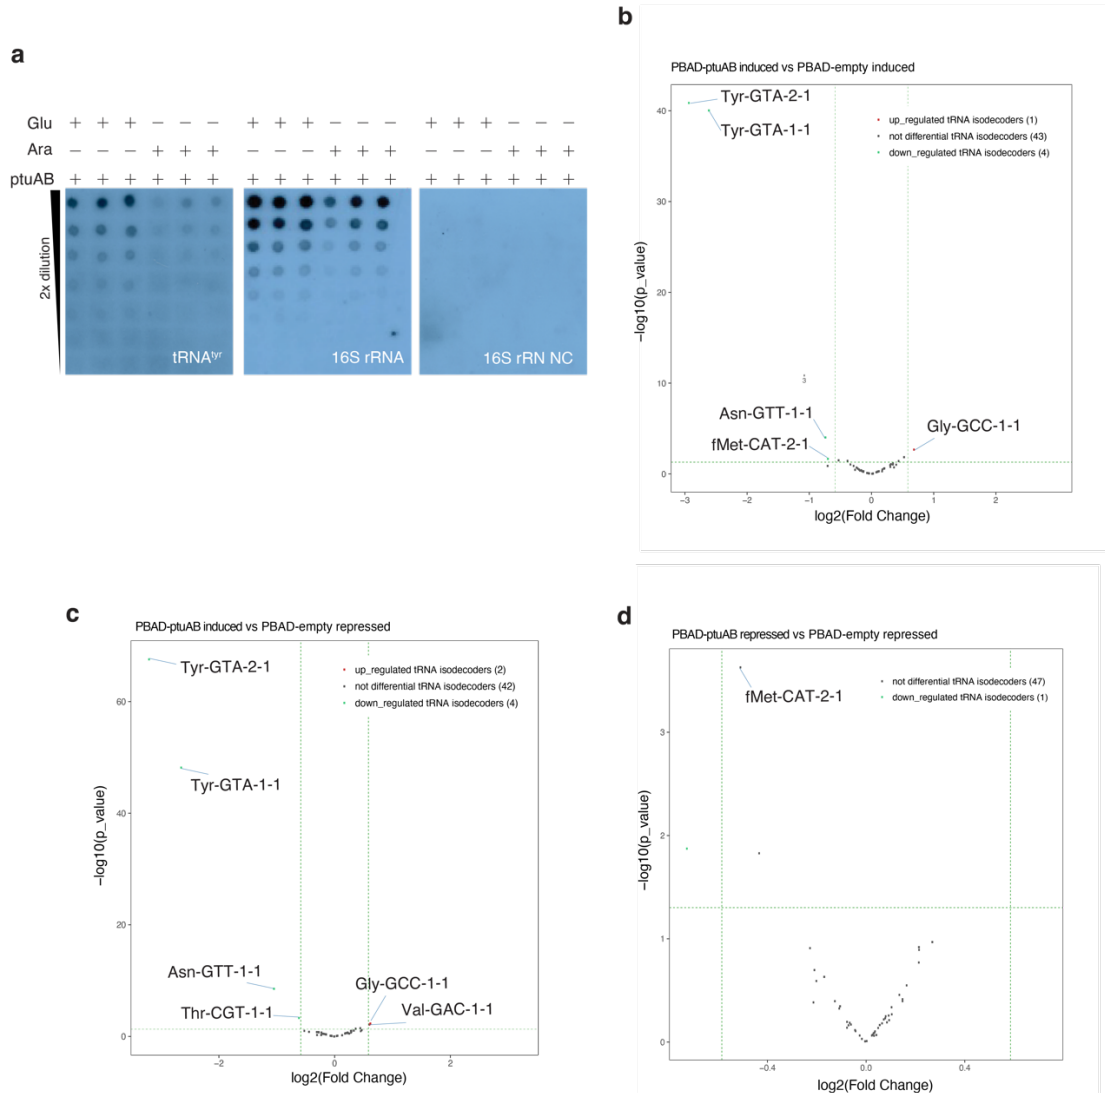

46  
47  
48  
49  
50  
51  
52  
53  
54  
55  
56  
57  
58

### Supplementary Figure 6.

The expression of PtuAB from Ec78 resulted in the degradation of tRNA-Tyr. (A) RNA hybridization dot blot assay of bacteria that express PtuAB. From left to right; tRNA-Tyr, 16S rRNA, and 16S rRNA negative control. Sense oligo of 16S rRNA was used as the negative control. Expression level comparison between bacteria with induced PtuAB and induced empty vector (B); with induced PtuAB and repressed empty vector (C); and with repressed PtuAB and repressed empty vector (D). Induction and repression of PtuAB expression were performed with 0.2% of arabinose and glucose, respectively. Experiments for results in (B), (C), and (D) were performed in duplicates.





### Dot blot of tRNA-Tyr

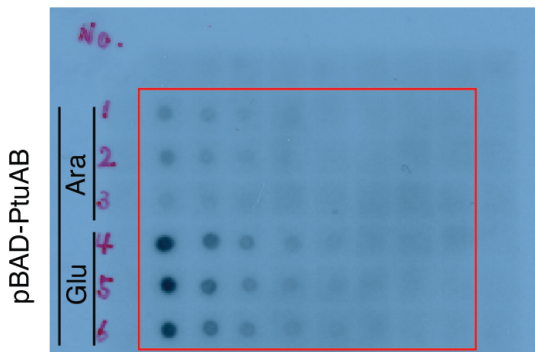

### Dot blot of 16S rRNA

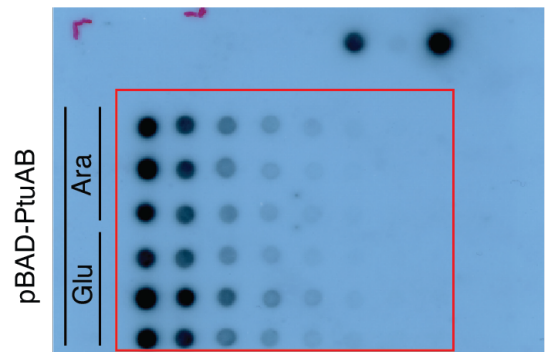

### Dot blot of Negative control

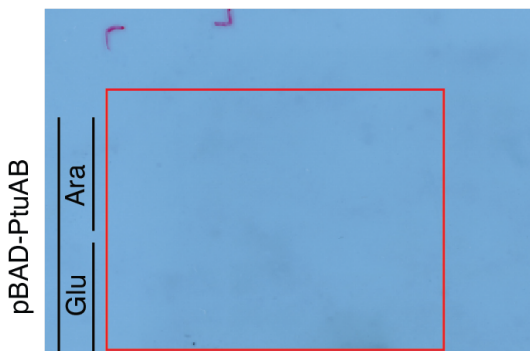

69

70 **Supplementary Figure 8.**

71 Uncropped photo of RNA hybridization dot blot from Supplementary Figure 6.

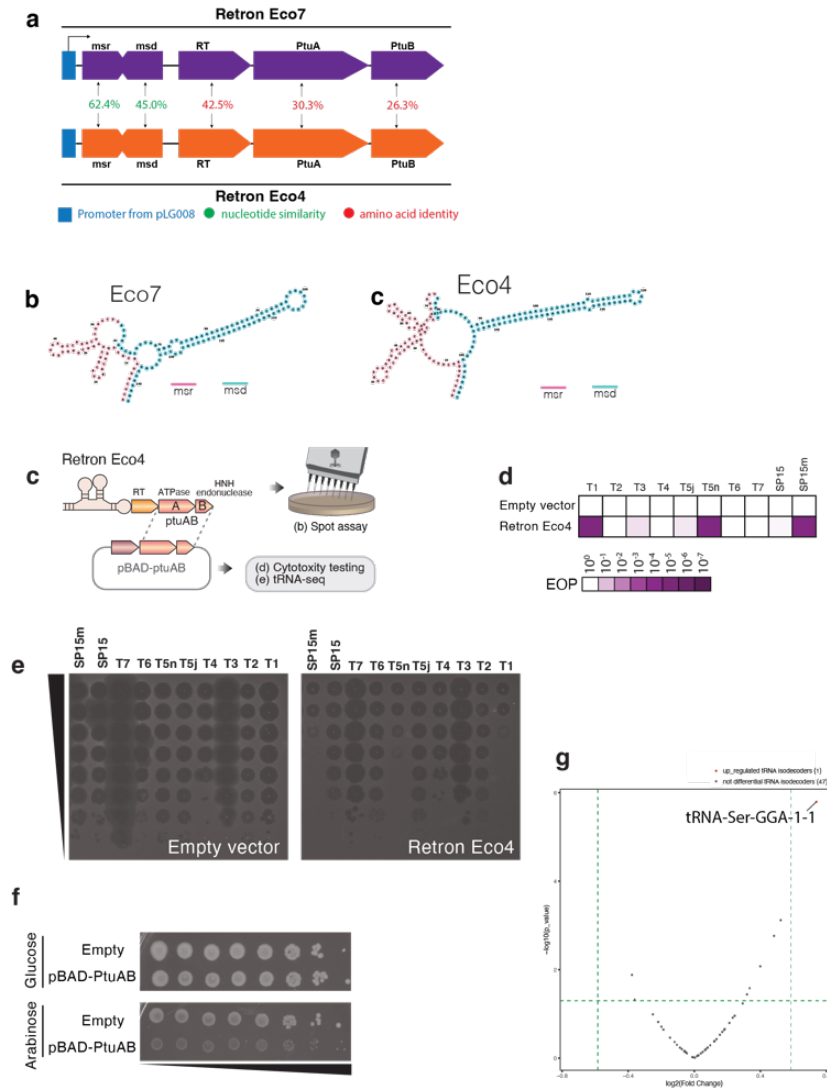

72

73 **Supplementary Figure 9.**

74 Characterization of retron-Eco4. (A) Genomic alignment between retron-Eco7 and retron-Eco4.

75 (B) Predicted RNA structure of retron-Eco7 and -Eco4 based on RNAfold prediction<sup>4</sup>. (C) Figure

76 illustrating expression of PtuAB from retron-Eco8 under the pBAD inducible plasmid. Bacteria

77 carrying pBAD-PtuAB were used for cytotoxicity assay and tRNA-sequencing. Defense activity

78 of retron-Eco4 on various phages shown in a heatmap (D) and spot assay (E). Source data are

79 provided as a Source Data File. (F) Bacterial growth arrest observed following overexpression of

80 PtuAB. (G) Volcano plot illustrating the results of tRNA-sequencing in bacteria expressing PtuAB.

81 The fold-change was determined by comparing the total tRNA expression observed in bacteria

82 carrying pBAD-PtuAB induced with arabinose to the tRNA expression observed in bacteria

83 carrying pBAD-PtuAB repressed with glucose.

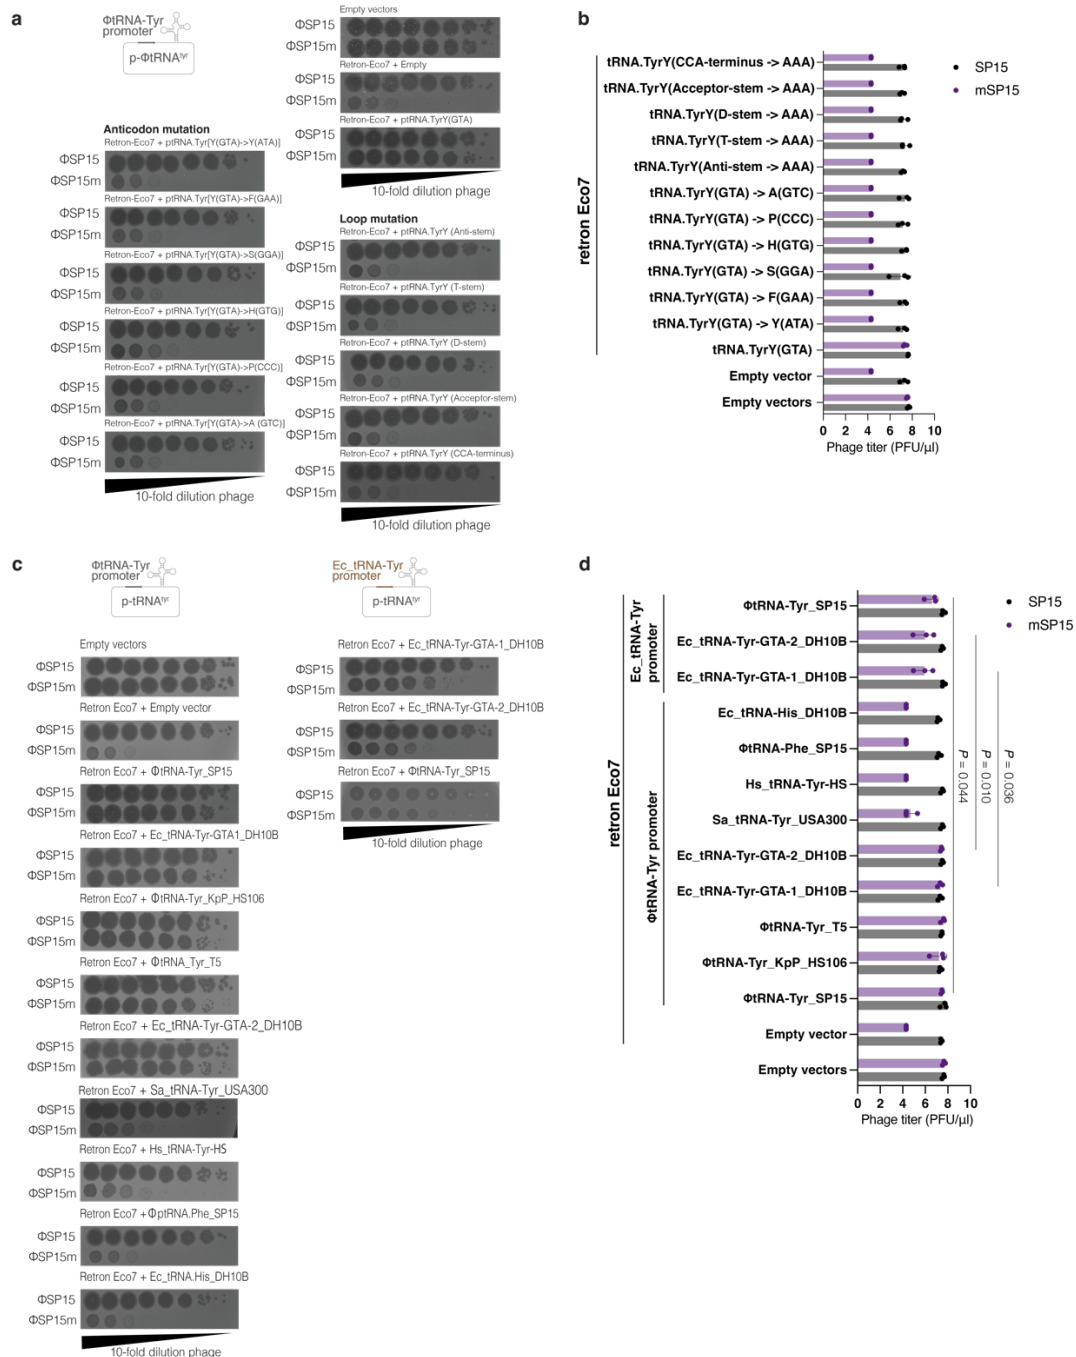

84  
85  
86  
87  
88  
89  
90  
91  
92  
93  
94

### Supplementary Figure 10. Co-expression of retron-Eco7 and tRNA-Tyr.

(A) Spot assay and (B) quantified phage titers (SP15 and SP15m) on bacteria carrying retron-Eco7 and various tRNA-Tyr\_SP15 mutants. (C) Spot assay and (D) quantified phage titers (SP15 and SP15m) on bacteria carrying retron-Eco7 and various tRNAs from different organisms. For tRNA-Tyr from *E. coli* (Ec\_tRNA-Tyr-GTA-2\_DH10B and Ec\_tRNA-Tyr-GTA-1\_DH10B) and phage SP15 (ΦtRNA-Tyr\_SP15), two different promoters, either the *E. coli* tRNA promoter or the phage tRNA promoter, were used. The experiments were performed in three biological replicates. Data are presented as mean values ± SD. Statistical significance is indicated by the *P*-value in the graph. Statistical analysis was performed using a two-tailed Student's *t*-test, assuming equal variances. Source data are provided in the Source Data file.

95  
96

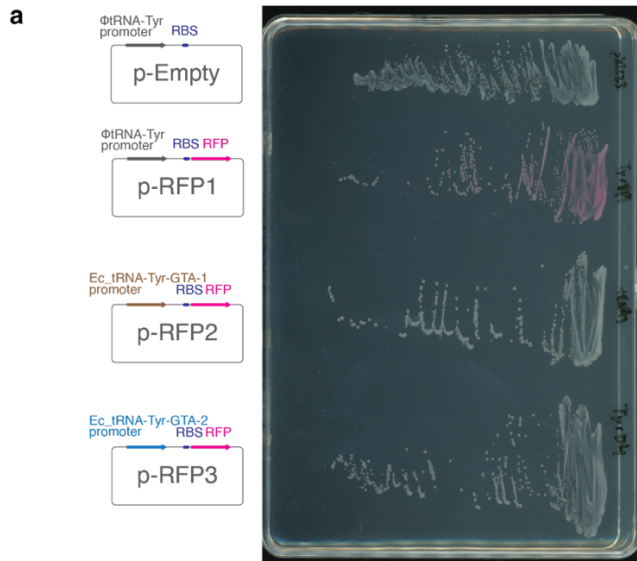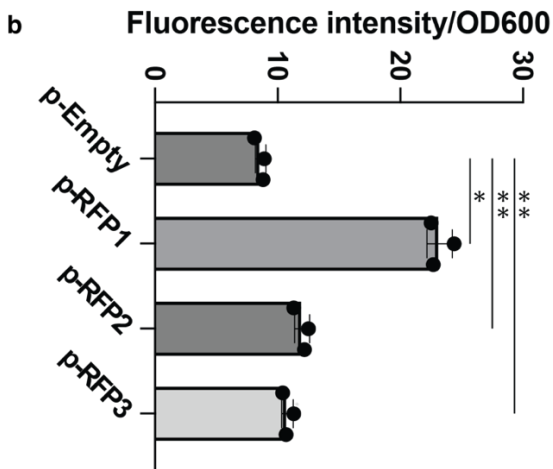

97

98 **Supplementary Figure 11.**

99 Evaluating the activity of tRNA promoter described in Fig 4F. (A) Promoter activity was evaluated  
100 by expressing red fluorescence protein (RFP). From top to bottom; empty vector (p-Empty)  
101 consisting of tRNA promoter from SP15 and ribosome-binding site (RBS), plasmid p-RFP1  
102 consisting of tRNA promoter from SP15, RBS, and RFP, plasmid p-RFP2 consisting of tRNA  
103 promoter from *E coli* tRNA-Tyr-GTA-1, RBS, and RFP, plasmid p-RFP3 consisting of tRNA  
104 promoter from *E coli* tRNA-Tyr-GTA-2, RBS, and RFP. (B) Fluorescence intensity of bacteria  
105 expressing RFP under different tRNA promoters.

106

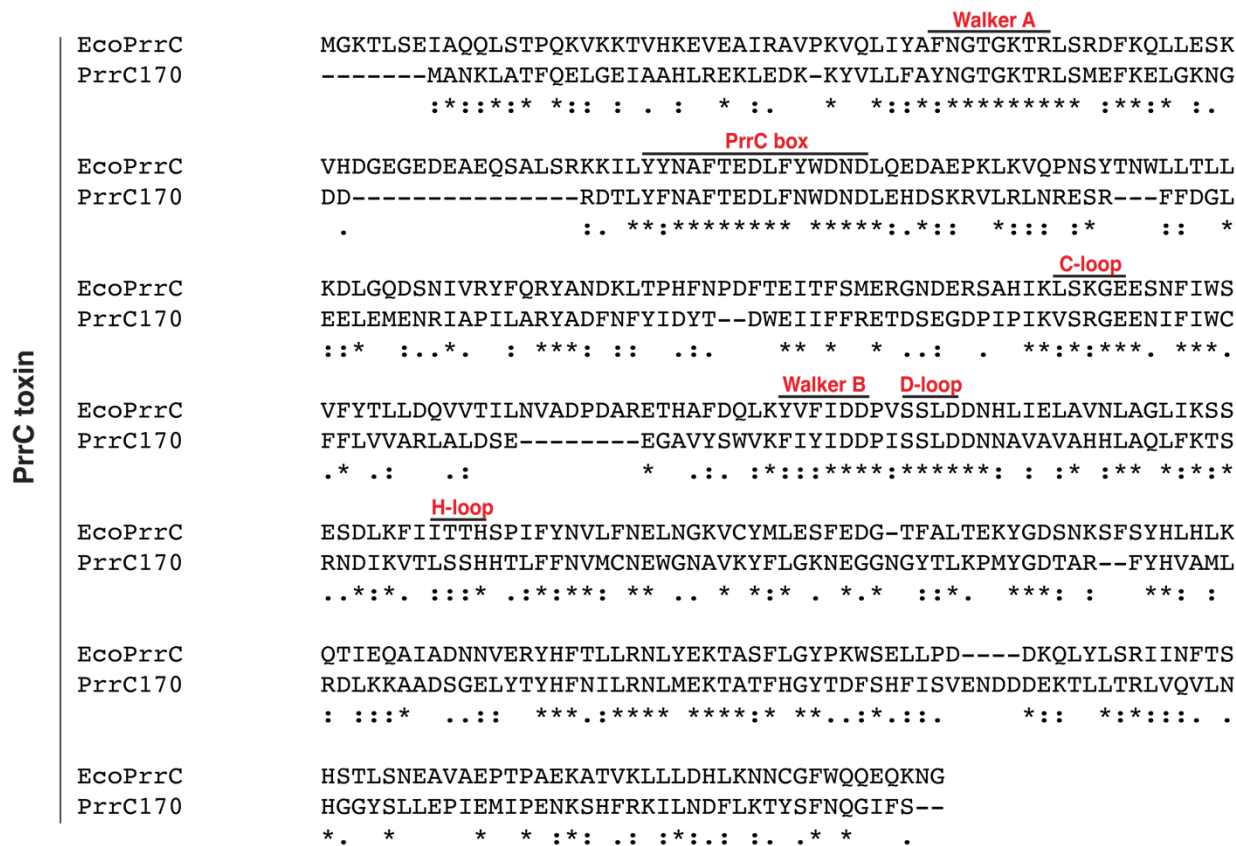

108  
109

110 **Supplementary Figure 12.** Amino acid alignment between the PrrC toxins of PrrC170 and  
111 EcoPrrC. Conserved ABC-ATPase domain and PrrC domain are highlighted in red letters.  
112

113  
114  
115  
116  
117  
118  
119  
120  
121  
122

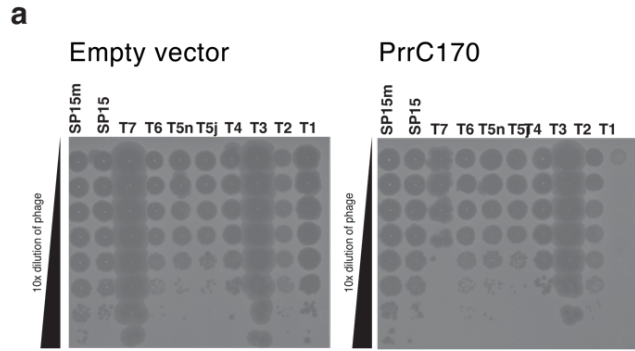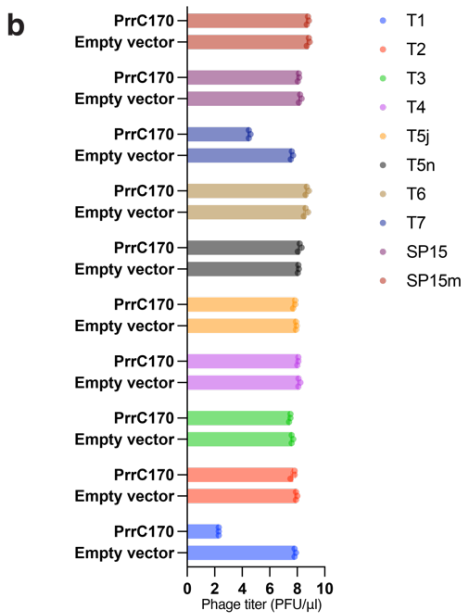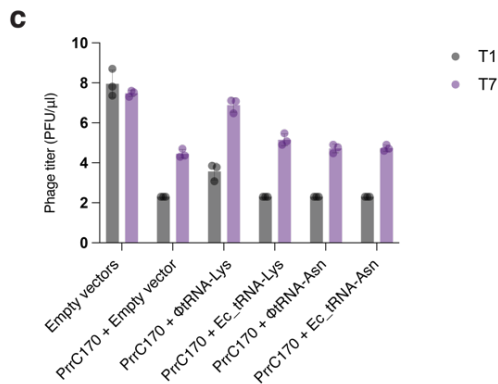

123  
 124 **Supplementary Figure 13.** Defense activity of the PrrC170 system. Spot assay (A) and quantified  
 125 phage titer (B) of various phages on bacteria carrying PrrC170. (C) Quantified phage titer of T1  
 126 and T7 on bacteria carrying PrrC170 and tRNA. *E. coli* tRNA<sup>Lys</sup> (Ec\_tRNA-Lys), *E. coli* tRNA<sup>Asn</sup>  
 127 (Ec\_tRNA-Asn), tRNA<sup>Lys</sup> from phage SP15 ( $\Phi$ tRNA-Lys), and tRNA<sup>Asn</sup> from phage SP15  
 128 ( $\Phi$ tRNA-Asn), were used. The experiments were performed in three biological replicates. Data  
 129 are presented as mean values  $\pm$  SD. Source data are provided as a Source Data File.  
 130

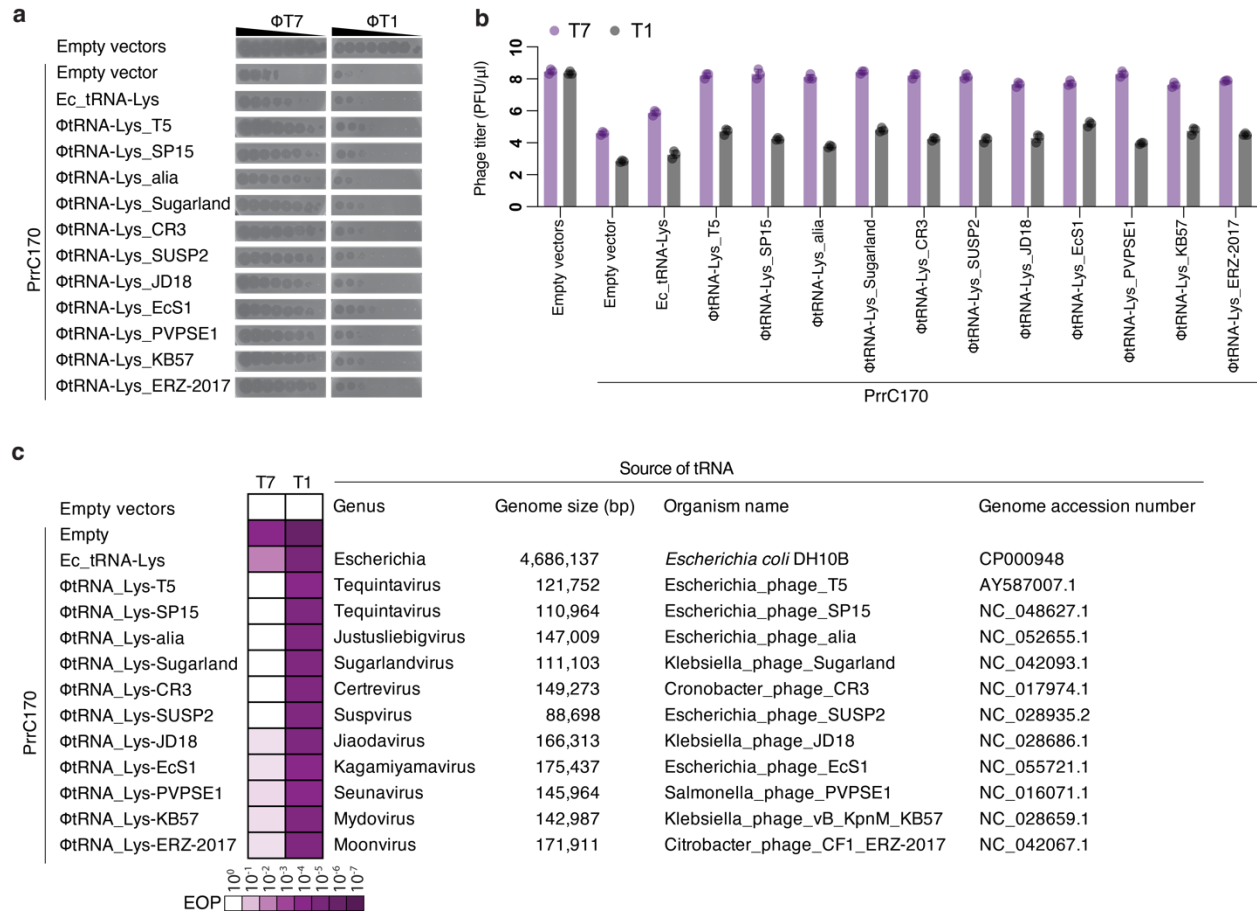

131  
 132  
 133  
 134  
 135  
 136  
 137  
 138  
 139  
 140  
 141  
 142  
 143  
 144  
 145  
 146  
 147  
 148  
 149

**Supplementary Figure 14.** Co-expression of PrrC170 and tRNA-Lys from *E. coli* and various phages. Spot assay (A) and quantified phage titer (B) for T1 and T7 phages on bacteria expressing PrrC170 and different tRNA-Lys. Heatmap (C) shows the changes in the efficiency of plating (EOP) in the phage assay on bacteria expressing PrrC170 and various tRNA-Lys. The sources of tRNA-Lys used in the assay are indicated. The experiments were performed in three biological replicates. Data are presented as mean values  $\pm$  SD. Source data are provided as a Source Data File.

150 **Supplementary References**

151

152 1. Gilchrist, C. L. M. & Chooi, Y.-H. clinker & clustermap.js: automatic generation of  
153 gene cluster comparison figures. *Bioinformatics* **37**, 2473–2475 (2021).

154 2. Oerum, S. *et al.* Structures of *B. subtilis* Maturation RNases Captured on 50S Ribosome  
155 with Pre-rRNAs. *Mol Cell* **80**, 227-236.e5 (2020).

156 3. Kiga, K. *et al.* Development of CRISPR-Cas13a-based antimicrobials capable of  
157 sequence-specific killing of target bacteria. *Nat Commun* **11**, (2020).

158 4. Gruber, A. R., Lorenz, R., Bernhart, S. H., Neubock, R. & Hofacker, I. L. The Vienna  
159 RNA Websuite. *Nucleic Acids Res* **36**, W70–W74 (2008).

160
