# Supplementary material for: Evasion of antiviral bacterial immunity by phage tRNAs
Source: PubMed Central journal article supplement (PMC11555353; doi:10.1038/s41467-024-53789-y), 2024-11-11
Supplement: 41467_2024_53789_MOESM2_ESM.pdf [file 41467_2024_53789_MOESM2_ESM.pdf]

## **Description of Additional Supplementary Files:**

**Supplementary Data 1:** Predicted tRNAs in the TRR region of T5-like phages. (a) Number of tRNA in the TRR region of each T5-like phage. (b) Number of T5-like phages and their corresponding tRNAs.

**Supplementary Data 2:** tRNA count of PtuAB Retron-Eco7 induced/non-induced bacteria.

**Supplementary Data 3:** tRNA count of PtuAB retron-Ec83 (Eco4) induced/noninduced bacteria.

**Supplementary Data 4:** tRNA count of PrrC induced/non-induced bacteria.

**Supplementary Data 5:** Prediction of antidefense gene in TRR region of T5-like phages.

**Supplementary Data 6:** Plasmids used in this study.

**Supplementary Data 7:** Bacteria and bacteriophages used in this study.

**Supplementary Data 8:** Primers used in this study.

**Supplementary Data 9:** Synthetic plasmids and oligo DNA of tRNAs used in this study.

(A) List of synthetic plasmids used in the study.

(B) Oligo DNA sequences of tRNAs used in the study
